# Supplementary material
Source: publisher figshare collection journal article supplement (https://tandf.figshare.com/ndownloader/files/16751579)

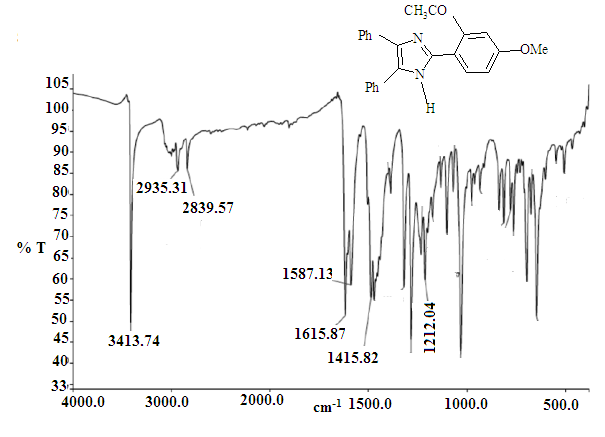


1H NMR (CDCl3, 400 MHz) δ: 10.34 (1H, s), 6.6-8.4 (13H, m, Ar), 4.03 (3H, s), 3.9 (3H, s) ppm

13C NMR (CDCl3, 100 MHz) δ: 161, 156, 144, 137, 131, 129.3, 128.8, 128.2, 127.8, 127.6, 127.4, 126.7, 125.9, 111.6, 105, 98.8, 55, 53 ppm.


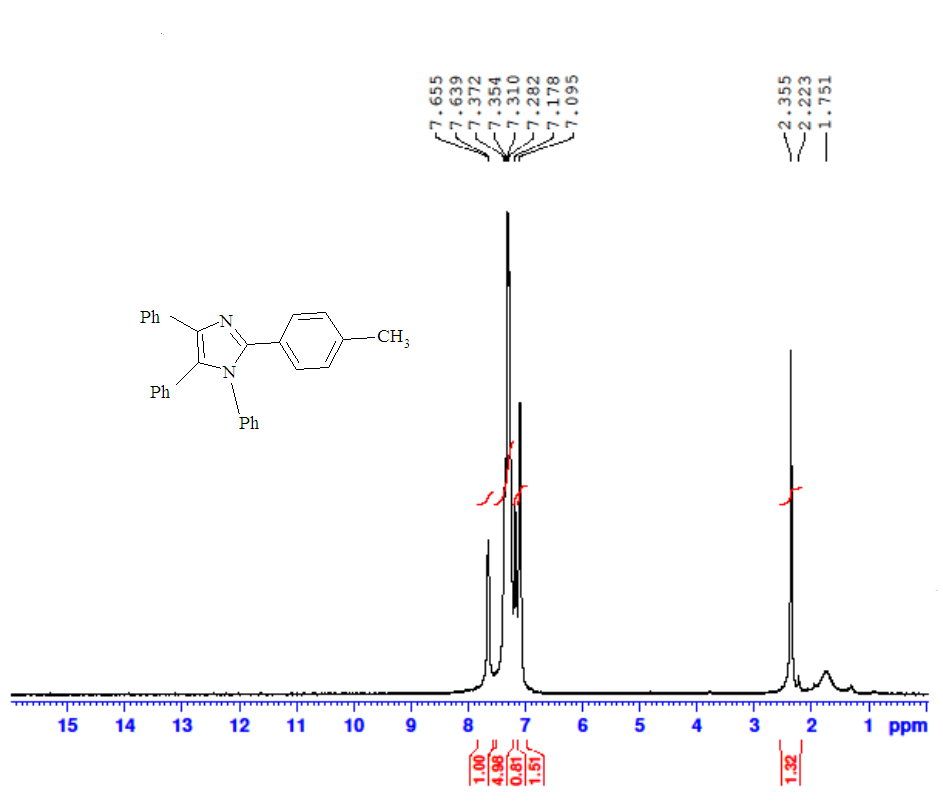


1H NMR (CDCl3, 400 MHz) δ: 2.23-2.35 (3H, t), 7.09-7.17(2H, d), 7.28-7.31(2H, d), 7.35-7.37 (m, 10H), 7.63-7.65 (5H, d).

Supplement: Supplementary file 1 [file 16751579]
